# Supplementary material for: The Response and Feedback of Ocean Mesoscale Eddies to Four Sequential Typhoons in 2014 Based on Multiple Satellite Observations and Argo Floats
Source: MDPI journal article supplement (doi:10.3390/rs13193805), 2021-09-23
Supplement: s1 [file s1]

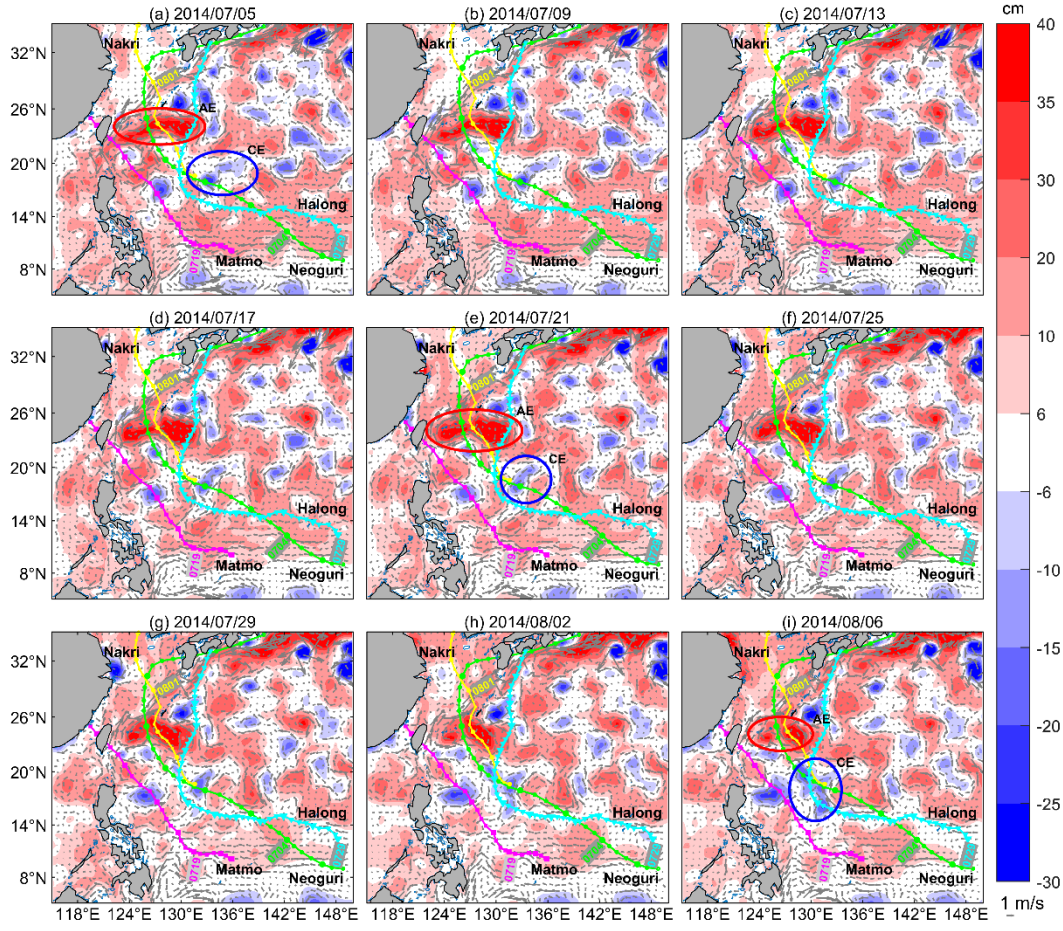

Figure S1: Evolutions of the altimeter-derived SSHA (shaded, cm) and surface geostrophic velocity (arrows) during the passage of typhoon Nida (5 July–6 August 2014). The colored lines indicate the TC tracks.
